# Supplementary material
Source: PubMed Central journal article supplement (PMC7254830)
Supplement: la0c00393_si_001.pdf [file la0c00393_si_001.pdf]

# Supplementary information

Corresponding to:

## Spatiotemporal heterogeneity of $\kappa$ - carrageenan gels investigated via single-particle-tracking fluorescence microscopy

Koen J.A. Martens<sup>1,2</sup>, John van Duynhoven<sup>1,3</sup>, Johannes Hohlbein<sup>1,4,\*</sup>

<sup>1</sup> Laboratory of Biophysics, Wageningen University and Research, Stippeneng 4, 6708 WE Wageningen, The Netherlands

<sup>2</sup> Laboratory of Bionanotechnology, Wageningen University and Research, Bornse Weiland 9, 6708 WG Wageningen, The Netherlands

<sup>3</sup> Unilever Global Foods Innovation Centre, Bronland 14, 6708 WH, Wageningen, The Netherlands

<sup>4</sup> Microspectroscopy Research Facility, Wageningen University and Research, Stippeneng 4, 6708 WE Wageningen, The Netherlands

\* Corresponding author. Email: [johannes.hohlbein@wur.nl](mailto:johannes.hohlbein@wur.nl), Tel.: +31 317 482 635

### Contents

|                    |   |
|--------------------|---|
| Figure S. 1.....   | 2 |
| Figure S. 2: ..... | 2 |
| Movie S. 1: .....  | 3 |
| Movie S. 2: .....  | 3 |

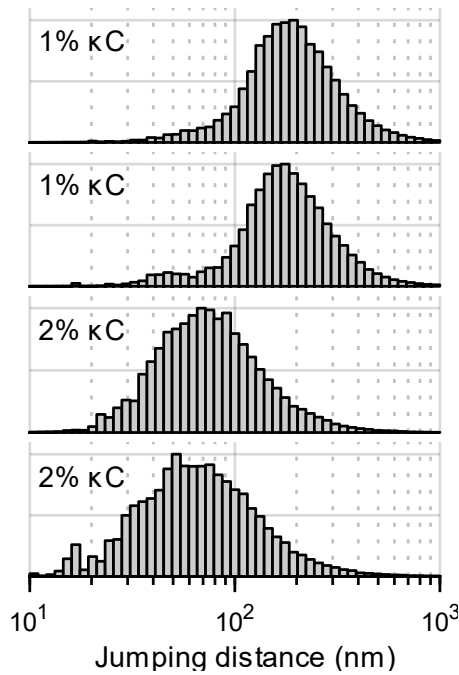

**Figure S. 1:** Histogram of jumping distances, weighted on track length, of probes in 1 – 2% (w/w)  $\kappa$ -carrageenan polymer solutions (two repetitions of each sample) without any salt addition.

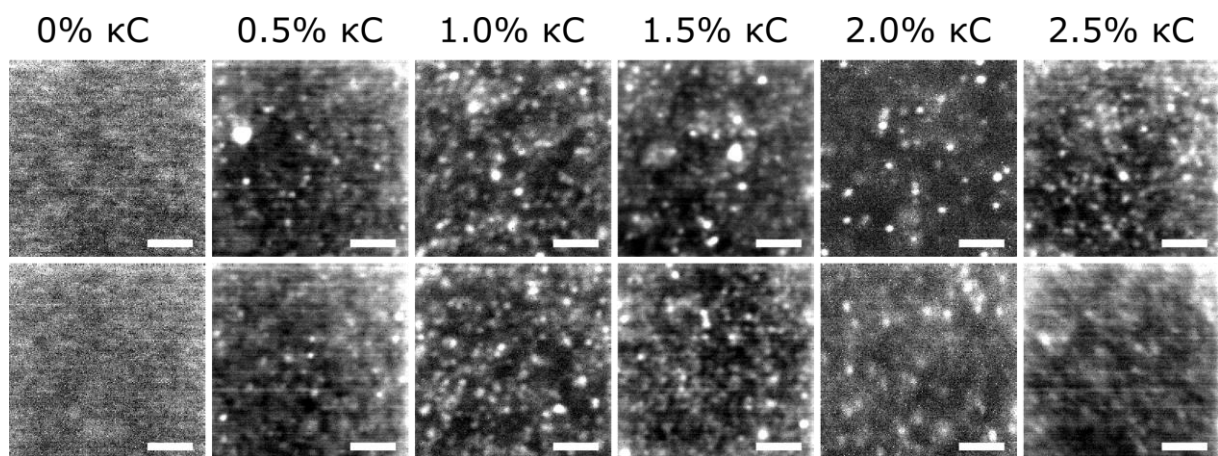

**Figure S. 2:** Probe infusion investigated with rescan confocal microscopy. The median value of a 50-frame window is shown, and the intensity for every individual image is rescaled to remove the highest and lowest 1% intensity values. The observed horizontal patterns represent the fast scanning direction of the RCM. Rows are repetitions of the same sample. For the 0%  $\kappa$ -carrageenan sample, 25% glycerol is used to decrease the diffusion coefficient of the nanosphere without introducing spatial heterogeneity. Scalebars represent 2.5  $\mu\text{m}$ .

**Movie S. 1:** Rescan confocal microscopy operating at 1 Hz of 2%  $\kappa$ -Carrageenan infused with 0.03% (w/v) fluorescent nanoprobe. Images shown in Figure 4B are extracted from this movie.

**Movie S. 2:** Rescan confocal microscopy operating at 1 Hz of 0.03% (w/v) fluorescent nanoprobe in milli-Q water.
